# Supplementary material
Source: Research Square preprint supplement (doi:10.21203/rs.3.rs-9599932/v1)
Supplement: Supplementary file 1 [file db916edab203b11befa43033.docx]

Table 1: Details of physical, mechanical and chemical characteristics of AT samples before and

after treatment

| Characteristics *a* |  | before treatment | | | |  | | after treatment | | | standard  value |
| --- | --- | --- | --- | --- | --- | --- | --- | --- | --- | --- | --- |
| ASTM | SF | S1-5 | S5 |  | | SF | | S1-5 | S5 |  |
| Penetration @ 25 °C | D5 | 48 | 33 | 29 |  | | 43 | | 25 | 21 | 60-70*b* |
| Specific gravity @25 °C | D70 | 1.10 | 1.10 | 1.11 |  | | 1.10 | | 1.11 | 1.12 | 1.01-1.060 |
| Softening Point | D36 | 51 | 55 | 57 |  | | 53 | | 56 | 58 | 46-56 |
| Ductility @ 25 °C | D113 | 33 | 26 | 24 |  | | 25 | | 21 | 20 | 100 Min |
| Solubility in CS2 | D4 | 98.7 | 98.7 | 98.7 |  | | 98.7 | | 98.7 | 98.6 | 99.0 Min |
| Kinematic Viscosity@135°C | D2170 | 212 | 249 | 255 |  | | 223 | | 252 | 268 | 240 |
| Ash content | D482 | 1.6 | 1.6 | 1.6 |  | | 1.5 | | 1.5 | 1.5 | 1 Max |
| Heat of combustion | D5468 | - | - | - |  | | 41283 | | 41290 | 41300 | 42770 |

*a* Units of parameters in the order of the first column; (0.1 mm), (gr/cm3), (°C), (Cm), (wt%), (cSt), (wt%), (kJ/kg)

*b* Based on the values for bitumen grade 60/70 reported Zakaria (2018)

Table 2: Details of the cracking products for different types of treated sample

| Product |  | S (%) without catalyst | | |  | S (%) with catalyst | | |
| --- | --- | --- | --- | --- | --- | --- | --- | --- |
|  | SF | S1-5 | S5 |  | SF | S1-5 | S5 |
| Flue gas (C1-C2) |  | 1.1 | 0.9 | 1.0 |  | 3.8 | 2.9 | 2.9 |
| LPG (C3-C4) |  | 3.0 | 2.5 | 2.7 |  | 7.1 | 6.5 | 6.7 |
| Naphtha (C5-C8) |  | 5.7 | 4.7 | 4.1 |  | 29.7 | 25.3 | 25.7 |
| Kerosene (C9-C12) |  | 14.5 | 13 | 13.8 |  | 21.8 | 18.2 | 18.1 |
| Light oil (C13-C24) |  | 26.0 | 20.7 | 21.5 |  | 26.4 | 25.7 | 25.3 |
| Heavy oil (>C25) |  | 45.8 | 41.9 | 40.0 |  | 10.9 | 18.8 | 19.0 |
| Residual |  | 3.9 | 16.3 | 16.9 |  | 0.3 | 2.6 | 2.3 |

Table 3: Characteristics of prepared bitumen-based compounds by different content of SBS

| Characteristics *a* |  | SF | | | |  | | S1-5 | | | |  | | S5 | | | |
| --- | --- | --- | --- | --- | --- | --- | --- | --- | --- | --- | --- | --- | --- | --- | --- | --- | --- |
|  | 1% SBS | 3%  SBS | 5% SBS |  | | 1% SBS | | 3% SBS | 5% SBS |  | | 1% SBS | | 3% SBS | 5% SBS |
| Penetration @ 25 °C |  | 37 | 30 | 27 |  | | 21 | | 19 | 18 |  | | 19 | | 17 | 15 |
| Specific gravity @25 °C |  | 1.08 | 1.10 | 1.10 |  | | 1.09 | | 1.10 | 1.09 |  | | 1.10 | | 1.11 | 1.11 |
| Softening Point |  | 54 | 56 | 59 |  | | 59 | | 62 | 65 |  | | 61 | | 63 | 66 |
| Ductility @ 25 °C |  | 86 | 94 | 102 |  | | 78 | | 83 | 88 |  | | 76 | | 80 | 84 |
| Kinematic Viscosity@135°C |  | 240 | 253 | 252 |  | | 253 | | 254 | 259 |  | | 267 | | 269 | 272 |

*a* Units of parameters in the order of the first column; (0.1 mm), (gr/cm3), (°C), (Cm), (cSt)

Table 4: Details of physical, mechanical and chemical characteristics of oil samples

| Characteristics | ASTM number | No 1 *a* | No 2 *b* | Standard *c,* |
| --- | --- | --- | --- | --- |
| Color | D1500 | 2.3 | 2.1 | 2.1 *d* |
| Density @ 30 °C (gr/cm3) | D1298 | 0.896 | 0.900 | 0.902 |
| Kinematic Viscosity @ 40 °C (cSt) | D445 | 38.5 | 38.8 | 39.1 |
| Kinematic Viscosity @ 100 °C (cSt) | D445 | 7.0 | 7.0 | 7.3 |
| Viscosity Index | 2270 | 124 | 125 | 127 *d* |
| Flash Point (°C) | D92 | 207 | 207 | 210 |
| Pour Point (°C) | D6749 | -2 | -1 | -1 |
| TAN (mg KOH/g oil) | D664 | 0.2 | 0.2 | 0.2 |

*a* Oil recovered in unit of spent clay treatment, *b* Oil obtained from treatment of SF sample, *c* form data reported by Salem (2015), *d* from details archived in the factory

Table 5: Details of XRF analysis and BET measurement of fresh and regenerated clay

| Type | SiO2 | Al2O3 | K2O | Na2O | CaO | MgO | Fe2O3 | L.O.I |
| --- | --- | --- | --- | --- | --- | --- | --- | --- |
| Ca-type bentonite | 67.7 | 11.9 | 0.8 | 0.3 | 4.2 | 2.6 | 0.8 | 11.7 |
| Regenerated bentonite | 67.9 | 12.0 | 0.6 | 0.2 | 4.1 | 2.4 | 0.8 | 12.0 |
|  |  |  |  |  |  |  |  |  |
|  | SBET | | | Pore volume (cm3/g) | | | Average pore size (nm) | |
| Ca-type bentonite | 31.8 | | | 0.093 | | | 11.7 | |
| Regenerated bentonite | 27.7 | | | 0.082 | | | 12.2 | |
